1 **Chloroquine and hydroxychloroquine as ACE2 blockers to inhibit viropexis of**  
2 **2019-nCoV Spike pseudotyped virus**

3 Nan Wang<sup>a, b#</sup>, Shengli Han<sup>a, b#</sup>, Rui Liu<sup>a, b#</sup>, Liesu Meng<sup>c, d#</sup>, Huaizhen He<sup>a, b#</sup>, Yongjing Zhang<sup>a, b#</sup>,  
4 Cheng Wang<sup>a, b</sup>, Yanni Lv<sup>a, b</sup>, Jue Wang<sup>a, b</sup>, Xiaowei Li<sup>c, d</sup>, Yuanyuan Ding<sup>a, b</sup>, Jia Fu<sup>a, b</sup>, Yajing Hou<sup>a,</sup>  
5 <sup>b</sup>, Wen Lu<sup>a, b</sup>, Weina Ma<sup>a, b</sup>, Yingzhan Zhan<sup>a, b</sup>, Bingling Dai<sup>a, b</sup>, Jie Zhang<sup>a, b</sup>, Xiaoyan Pan<sup>a, b</sup>, Shiling  
6 Hu<sup>a, b</sup>, Jiapan Gao<sup>a, b</sup>, Qianqian Jia<sup>a, b</sup>, Liyang Zhang<sup>a, b</sup>, Shuai Ge<sup>a, b</sup>, Saisai Wang<sup>a, b</sup>, Peida Liang<sup>a, b</sup>,  
7 Tian Hu<sup>a, b</sup>, Jiayu Lu<sup>a, b</sup>, Xiangjun Wang<sup>a, b</sup>, Huaxin Zhou<sup>a, b</sup>, Wenjing Ta<sup>a, b</sup>, Yuejin Wang<sup>a, b</sup>, Shemin  
8 Lu<sup>c, d\*</sup>, Langchong He<sup>a, b\*</sup>

9  
10 <sup>a</sup> School of Pharmacy, Xi'an Jiaotong University, Xi'an, Shaanxi, 710061, China.

11 <sup>b</sup> Institute of Vascular Materia Medica, Xi'an Jiaotong University, Xi'an, Shaanxi, 710116,  
12 China.

13 <sup>c</sup> Department of Biochemistry and Molecular Biology, School of Basic Medical Sciences, Xi'an  
14 Jiaotong University Health Science Center, West Yanta Road No.76, Xi'an, Shaanxi 710061,  
15 China

16 <sup>d</sup> The Second Affiliated Hospital of Xi'an Jiaotong University (Xibei Hospital), Xi'an, Shaanxi  
17 710004, China

18 #These authors contributed equally to this work.

19 \*Correspondence Author: Langchong He, Shemin Lu

20 **Address for correspondence**

21 School of Pharmacy, Xi'an Jiaotong University, Yanta Westroad, Xi'an 710061, China.

22  
23 E-mail: [helc@mail.xjtu.edu.cn](mailto:helc@mail.xjtu.edu.cn), [lushemin@mail.xjtu.edu.cn](mailto:lushemin@mail.xjtu.edu.cn)

24 Tel: +86-29-82656788

25 Fax: +86-29-82655451  
26  
27  
28  
29  
30  
31  
32  
33

34 **Abstract**

35 **Background:** The novel coronavirus disease (2019-nCoV) has been affecting global health since  
36 the end of 2019 and there is no sign that the epidemic is abating. The major issue for controlling  
37 the infectious is lacking efficient prevention and therapeutic approaches. Chloroquine (CQ) and  
38 Hydroxychloroquine (HCQ) have been reported to treat the disease, but the underlying mechanism  
39 remains controversial.

40 **Purpose:** The objective of this study is to investigate whether CQ and HCQ could be ACE2 blockers  
41 and used to inhibit 2019-nCoV virus infection.

42 **Methods:** In our study, we used CCK-8 staining, flow cytometry and immunofluorescent staining  
43 to evaluate the toxicity and autophagy of CQ and HCQ, respectively, on ACE2 high-expressing  
44 HEK293T cells (ACE2<sup>h</sup> cells). We further analyzed the binding character of CQ and HCQ to ACE2  
45 by molecular docking and surface plasmon resonance (SPR) assays, 2019-nCoV spike pseudotyped  
46 virus was also used to observe the viropexis effect of CQ and HCQ in ACE2<sup>h</sup> cells.

47 **Results:** Results showed that HCQ is slightly more toxic to ACE2<sup>h</sup> cells than CQ. Both CQ and  
48 HCQ could bind to ACE2 with  $K_D = (7.31 \pm 0.62) \times 10^{-7}$  M and  $(4.82 \pm 0.87) \times 10^{-7}$  M, respectively. They  
49 exhibit equivalent suppression effect for the entrance of 2019-nCoV spike pseudotyped virus into  
50 ACE2<sup>h</sup> cells.

51 **Conclusions:** CQ and HCQ both inhibit the entrance 2019-nCoV into cells by blocking the binding  
52 of the virus with ACE2. Our findings provide novel insights into the molecular mechanism of CQ  
53 and HCQ treatment effect on virus infection.

54 **Key words:** *chloroquine; hydroxychloroquine; 2019-nCoV; ACE2*

55

## 56 **Introduction**

57 Chloroquine (CQ) and hydroxychloroquine (HCQ) are effective antimalarial drugs (White, 1996).  
58 The sole difference between their chemical structures is the presence of a hydroxymethyl group on  
59 HCQ as against a methyl group on CQ. The hydroxymethyl group enables HCQ to be absorbed in  
60 the human gastrointestinal tract faster and distributed in the body to larger extent than CQ (Rainsford  
61 et al., 2015; Schrezenmeier and Dorner, 2020). Since 2004, reports on the anti-viruses effects of CQ  
62 and HCQ have gradually increased. For example, CQ can inhibit the replication of SARS and HIV  
63 viruses *in vitro*, and it also has significant inhibitory effects on Borna, avian leukemia and Zika  
64 viruses. (Al-Bari, 2017; Keyaerts et al., 2004; Savarino et al., 2006). Therefore, CQ and HCQ have  
65 been considered broad-spectrum antiviral drugs.

66 Since the outbreak of 2019-nCoV (also called SARS-CoV-2) in 2020, there have been reports of  
67 CQ and HCQ used in clinical treatment. For example, clinical trial reports issued by 10 hospitals in  
68 China indicate that CQ may shorten the duration of the disease (Gautret et al., 2020). A small  
69 nonrandom clinical trial in France showed that HCQ combined with azithromycin has a significant  
70 therapeutic effect (Gautret et al., 2020), and it has been reported that CQ can effectively inhibit the  
71 deterioration of new coronary pneumonia, improve lung imaging performance, promote viral  
72 reversion and shorten the time of disease onset (Gao et al., 2020). It has been hypothesized that HCQ  
73 aerosols can be inhaled early in infection, allowing for the sufficient therapeutic effects on alveolar  
74 epithelial cells while avoiding the adverse effects of large oral doses (Klimke et al., 2020). However,  
75 it has also been reported that the combination of HCQ and azithromycin in 11 patients with severe  
76 2019-nCoV infection has not achieved a positive clinical effect (Molina et al., 2020). Another  
77 observational study showed that HCQ had no effect on the intubation or composite endpoint of death  
78 (Geleris et al., 2020). There is still a lack of randomized controlled trials of HCQ in the treatment  
79 of patients with 2019-nCoV.

80 At present, it is generally believed that the 2019-nCoV enters the host cell by binding to ACE2 on  
81 the plasma membrane of the cells, causing infection (Hoffmann et al., 2020; Wrapp et al., 2020;  
82 Zheng et al., 2020). Therefore, blocking or antagonizing the ACE2 signaling pathway in susceptible  
83 cells should be beneficial in the prevention of 2019-nCoV infection (Wu et al., 2020). Abdelli *et al.*  
84 conducted a molecular docking experiment between CQ and ACE2 and found that CQ binds to  
85 ACE2 with low binding energy and forms a stable complex system (Abdelli et al., 2020). Studies  
86 have shown that ACE2 is a type I membrane-bound glycoprotein composed of 805 amino acids,  
87 mainly distributed in vascular endothelial cells, alveolar and renal tubular epithelial cells, and  
88 profoundly expressed in tissues such as heart, kidney, retina, and gastrointestinal tissue (Xiao et al.,  
89 2020). Flow cytometry and immunoprecipitation studies have shown that during alveolar epithelial  
90 cell infection with SARS virus, CQ and HCQ can prevent the binding of viral S protein to ACE2 by  
91 disrupting ACE2 terminal glycosylation (Brufsky, 2020; Vincent et al., 2005). Virus infection  
92 experiments *in vitro* confirmed that CQ could reduce the infection of cells by 2019-nCoV, and play  
93 a role in both the entry and post-entry stages of viral infection. At the same time, HCQ can  
94 effectively reduce the 2019-nCoV copy number (Wang et al., 2020b).

95 Recently, there have also been reports of adverse reactions of HCQ and CQ. A clinical trial of 90  
96 patients with 2019-nCoV infection in the United States showed that 2019-nCoV positive patients  
97 receiving HCQ treatment had a higher risk of prolonged QTc, suggesting a risk of cardiotoxicity

98 (Mercuro et al., 2020). At the same time, in a clinical trial of 197 2019-nCoV positive patients in  
99 China, CQ showed a significant therapeutic effect without severe adverse reactions (Mingxing et  
100 al., 2020). The above evidence suggests that the adverse effects of CQ treatment in 2019-nCoV  
101 positive patients may be lower than that of HCQ. The curative effect and mechanism of the anti-  
102 2019-nCoV of CQ and HCQ are still controversial.

103 In this study, we found that CQ and HCQ can antagonize ACE2 and inhibit the entry of 2019-nCoV  
104 spike pseudotyped virus into ACE2 expressed HEK293T cells (ACE2<sup>h</sup> cells).

## 105 **Materials and Methods**

### 106 *Materials and Reagents*

107 CQ, the purity of 98%, was from Macklin (Shanghai, China), HCQ, the purity of 98 %, was provided  
108 by Energy Chemical, (Shanghai, China). Dulbecco's Modification of Eagle's Medium (DMEM) with  
109 high glucose (Cat. No. SH30022.01), and fetal bovine serum (Cat. No. 16140071) were from  
110 HyClone (Logan, UT, USA). Penicillin–streptomycin solution was obtained from Xi'an Hat  
111 Biotechnology Co., Ltd (Xi'an, China). Protease inhibitor and phosphatase inhibitor cocktails were  
112 purchased from Roche Diagnostic (Mannheim, Germany). The 5×loading buffer was purchased  
113 from Thermo Fisher Scientific, Inc. (MA, USA), and SDS-PAGE was from Pioneer Biotech Co.,  
114 Ltd (Xi'an, China). Polyvinylidene fluoride membranes were from Hangzhou Microna Membrane  
115 Technology Co., Ltd (Hangzhou, China). Tween-20 was provided by Shaanxi Pioneer Biotech Co.,  
116 Ltd (Xi'an, China). Enhanced Chemiluminescence (ECL) kit was from Proteintech Group, Inc  
117 (Rosemont, USA). Annexin V-FITC/PI Apoptosis Detection Kit (Cat. No. A005-3) and Cell  
118 Counting Kit were purchased from 7Sea Pharmatech Co., Ltd (Shanghai, China), the 2019-nCoV  
119 spike pseudotyped virus (Cat: PSV001) was purchased from Sino Biological (Beijing, China)

### 120 *Cell culture*

121 HEK293T cells, human airway epithelial cells (HSAEpC), alveolar type II epithelial cells (AT2),  
122 and eosinophilic leukemia (EOL-1) cells were from ATCC. ACE2<sup>h</sup> cells were constructed by  
123 Genomeditech (Shanghai, China). HSAEpC and AT2 cells were maintained in DMEM with high  
124 glucose containing 10% FBS and 1% penicillin-streptomycin; EOL-1 cells were kept in 1640  
125 medium containing 10% FBS and 1% penicillin-streptomycin; ACE2<sup>h</sup> cells were maintained in  
126 DMEM with high glucose medium containing 10% FBS, 1% penicillin-streptomycin, and 4 µg/mL  
127 puromycin and cultured at 37°C in a 5% CO<sub>2</sub> incubator.

### 128 *Cytotoxicity assay*

129 Cell viability was determined following the manufacturer's instructions. Briefly, ACE2<sup>h</sup> cells were  
130 seeded into 96-well plates at a density of  $5 \times 10^3$  cells per well and then treated with different  
131 concentrations of CQ or HCQ (0, 0.1, 1, 10, 50, 100, 200, 300 and 400 µM) for 24 h, then 10 µL of  
132 Cell Counting Kit solution was added to each well followed by 2 h of incubation. Relative cell  
133 viability was assessed by measuring the absorbance at 450 nm using a microplate reader (Bio-Rad,  
134 Carlsbad, CA, USA). The survival rate of ACE2<sup>h</sup> cells was calculated using the following formula:

135  $[(OD_{\text{Treated}} - OD_{\text{Blank}}) / (OD_{\text{Control}} - OD_{\text{Blank}})] \times 100\%$ . The time-dependent effects (6, 12, 24 and 48  
136 h) of HCQ and CQ on ACE2<sup>h</sup> cell viability at low concentrations (10 and 20 µM) were also observed

137 using the same method.

### 138 *Apoptosis assay*

139 ACE2<sup>h</sup> cells were seeded in a six-well plate and treated with different concentrations of CQ and  
140 HCQ (0, 10, 20 and 40  $\mu$ M) for 24 h. Cells were collected and washed with PBS and resuspended  
141 in 400  $\mu$ L of 1  $\times$  binding Buffer. Annexin V-FITC (5  $\mu$ L) was added to the cells and incubated 26 °C  
142 in the dark for 15 min. PI (10  $\mu$ L) was added to the cells and incubated in an ice bath for 5 min.  
143 Detection was performed within 30 min. The excitation wavelength of the flow cytometer (Accuri  
144 C6 Plus, BD Biosciences, Beijing, China) was 488 nm, and the emission wavelength was 530 nm  
145 to detect FITC, while PI was detected at 575 nm. Normal cells had low fluorescence intensity.  
146 Apoptotic cells had strong green fluorescence, and necrotic cells had double staining with green and  
147 red fluorescence.

### 148 *Western blotting*

149 Total proteins from different cells were extracted in ice-cold conditions using RIPA lysis buffer  
150 containing 10% protease inhibitor and a phosphatase inhibitor cocktail. The protein concentration  
151 was determined using a BCA Protein Quantification kit according to the manufacturer's instructions.  
152 The protein in the cell lysates was denatured by boiling the samples for 5 min with a 5  $\times$  loading  
153 sample buffer and equal amounts of protein were separated on a 10% gel using SDS-PAGE. The  
154 separated proteins were transferred onto polyvinylidene fluoride membranes and blocked by  
155 constant stirring with 5% nonfat milk in Tris-buffered saline containing Tween-20. The membranes  
156 were then incubated overnight at 4°C with the following primary antibodies: anti-ACE2 (1:500,  
157 EPR4435, Abcam), anti-LC3 (1:1000, #2775, Cell Signaling Technology [CST]) and anti-GAPDH  
158 (1:2000, a#2118, CST). The membranes were washed three times with TBST and then incubated  
159 with secondary antibodies (a dilution of 1:20,000 in TBST) for 1 h at 37°C. The membranes were  
160 washed three times with TBST for 10 min and developed using ECLkit. A Lane 1 DTM  
161 transilluminator (Beijing Creation Science, Beijing, China) was used to capture the images of the  
162 developed blots, and Image-Pro Plus 5.1 software (Rockville, MD, USA) was used to quantify the  
163 protein levels.

### 164 *Immunofluorescence assays*

165 ACE2<sup>h</sup> cells ( $2 \times 10^3$ ) were seeded on 24 mm $\times$ 24 mm coverslips. and incubated overnight at 37 °C  
166 with 5 % CO<sub>2</sub>. 10  $\mu$ M, 20  $\mu$ M or 40  $\mu$ M CQ and HCQ were added to the slides and treated for 24 h.  
167 The slides were then fixed with 4 % paraformaldehyde, followed with 0.5% Triton X-100 for 5 min  
168 and 5% BSA solution for 1 h at 26°C after washing three times with PBS. The cells were then  
169 continuously incubated with LC3 primary antibody at 37°C for 3 h, and the fluorescent secondary  
170 antibody at 26°C for 2 h followed with TRITC-Phalloidin stain for 30 min at 26°C . Finally, the  
171 cells were mounted with 50  $\mu$ L of DAPI-containing anti-fluorescence quenching reagent. All the  
172 cells were observed using a laser confocal fluorescence microscope.

### 173 *Docking Studies*

174 Molecular docking studies were carried out using SYBYL-X 2.0 version. The small molecules and  
175 X-ray crystal structure of the protein (PDB code: 6M0J) were imported. Water molecules were  
176 removed and hydrogen was added. Tripos force field and Pullman charge were applied to minimize.

177 CQ and HCQ were depicted by the Sybyl/Sketch module (Tripos Inc.), optimized by Powell's  
178 method with the Tripos force field with convergence criterion at 0.005 kcal/(Å mol), and assigned  
179 using Gasteiger–Hückel method.

### 180 *Surface plasmon resonance assay*

181 For assessment of surface plasmon resonance (SPR), ACE2 protein with a 6-his tag (30 µg/mL) was  
182 fixed on a carboxyl sensor chip (Nicoya, Canada) by capture-coupling. Then, CQ or HCQ at 6.25,  
183 12.5, 25, 50 and 100 µM was injected sequentially into the chamber in PBS running buffer. The  
184 interaction of ACE2 with the fixed small molecules was detected using Open SPR™ (Nicoya  
185 Lifesciences, Waterloo, Canada) at 25°C. The binding time and disassociation time were both 250  
186 s, the flow rate was 20 µL/s, and the chip was regenerated with hydrochloric acid (pH 2.0). A one-  
187 to-one diffusion-corrected model was fitted to the wavelength shifts corresponding to the varied  
188 drug concentration. The data were retrieved and analyzed using TraceDrawer.

### 189 *Detection of 2019-nCoV spike pseudotyped virus entry into ACE2<sup>h</sup> cells*

190 For this process,  $5 \times 10^4$  of ACE2<sup>h</sup> cells in 50 µL DMEM per well were seeded into white 96-well  
191 plates. The cells were cultured in a 37 °C incubator containing 5% CO<sub>2</sub> for 2 h. Medium (25 µL)  
192 was aspirated carefully from 96 wells, 25 µL medium containing the corresponding dose of the  
193 medicine was added and incubated for 2 h. Then 5 µL of 2019-nCoV spike pseudotyped virus was  
194 added (Sino Biological, PSC001), and incubated in a 37 °C incubator containing 5% CO<sub>2</sub> for 4 h  
195 followed with adding 100 µL of complemented DMEM per well. After 6-8 h of further infection,  
196 the culture medium containing the virus was removed and replaced by 200 µL of fresh DMEM, and  
197 incubated continuously at 37°C for 48 h, the culture medium was aspirated and 20 µL of cell lysate  
198 was added from the Luciferase Assay System (Promega, E1500) to each well, Following this, 100  
199 µL of luminescence solution was added to wells before the luciferase luminescence detection,  
200 chemiluminescence was detected by a microplate reader under 560 nm, with exposure time of 1 s.

### 201 *Statistical analysis*

202 Data are presented as the mean ± standard error of the mean (SD) and were statistically analyzed  
203 using analysis of variance (ANOVA). Two-tailed tests were used for comparisons between two  
204 groups, and differences were considered statistically significant at  $p < 0.05$ .

## 205 **Results**

### 206 *Effect of CQ and HCQ on ACE2<sup>h</sup> cell viability*

207 The expression of ACE2 protein in human lung and bronchial-related cells was higher than that in  
208 HEK293T cells. The expression of ACE2 protein in ACE2<sup>h</sup> cells was significantly higher than that  
209 in other cells, indicating that ACE2<sup>h</sup> cells were successfully constructed. It has been reported that  
210 AT2 cells express the highest ACE2 receptors in lung and bronchial cells (Zou et al., 2020). We  
211 confirmed that the highest expression of the ACE2 protein occurred in AT2 cells. In addition, this is  
212 the first report that EOL-1 cells also express the ACE2 protein (Figure 1A).

213 As shown in Figure 1B, CQ and HCQ had no significant effect on the activity of ACE2<sup>h</sup> cells when  
214 the concentration was less than 50 µM, and the survival rate of ACE2<sup>h</sup> cells could be reduced in a

215 dose-dependent manner when the concentration was above 50  $\mu\text{M}$ . The inhibition of HCQ on the  
216 activity of ACE2<sup>h</sup> cells was more significant than that of CQ. It can be concluded that the toxicity  
217 of HCQ was higher than that of CQ on ACE2<sup>h</sup> cells at different time points at the same  
218 concentrations (Figure 1C). At a concentration of 20  $\mu\text{M}$ , the statistical difference appeared at 6 h.  
219 Ca<sup>2+</sup> is an essential second messenger in several cell pathways, as shown in Figure 1D, and CQ or  
220 HCQ rarely affects Ca<sup>2+</sup> influx change in ACE2<sup>h</sup> cells. Figure 1E shows that within 24 h, the  
221 concentrations of both drugs had no significant effect on apoptosis.

### 222 *CQ and HCQ induce LC3-mediated autophagy in ACE2<sup>h</sup> cells*

223 Autophagosome is a spherical structure and as an essential marker for autophagy, and LC3 is known  
224 to be stably associated with the autophagosome membranes. LC3 includes two forms LC3-I and  
225 LC3-II, LC3-I is found in the cytoplasm, whereas LC3-II is membrane-bound and converted from  
226 LC3-I to initiate formation and lengthening of the autophagosome. Therefore, to investigate the  
227 effects of CQ and HCQ induced autophagy on ACE2<sup>h</sup> cells, FITC-LC3, TRITC-Phalloidin and  
228 DAPI staining were used. Activating lysosomal (green) and filamentous actin (F-actin, red) was  
229 detected after stimulation with 10, 20 and 40  $\mu\text{M}$  of CQ and HCQ in ACE2 cells (Figure 2A).

230 We further pretreated ACE2<sup>h</sup> cells with CQ and HCQ, and measured the expression of ACE2<sup>h</sup> cells  
231 autophagy proteins LC3-I and LC3-II by Western blotting. We found that the expression level of  
232 LC3 and LC3-II increased in CQ and HCQ-treated ACE2<sup>h</sup> cells (Figure 2B). The protein level of  
233 the LC3-II/LC3-I ratio was significantly increased compared to the control group (Figure 2B). All  
234 of these results suggested that CQ and HCQ could induce LC3-mediated autophagy in ACE2<sup>h</sup> cells.

### 235 *Binding characteristics of CQ and HCQ with ACE2*

236 The SARS-CoV-2 virus infects its host cells through binding to the ACE2 protein  
237 followed by cleavage of the spike protein by human TMPRSS2, we focused on whether  
238 CQ or HCQ could bind with ACE2. A virtual molecular docking test was performed to investigate  
239 the binding character of CQ and HCQ with ACE2. The chemical structure of both drugs are showed  
240 in Figure 3A. Figure 3B shows that both CQ and HCQ can bind to R393 and D350 (both in green)  
241 of ACE2 with their quinoline and imino groups. In addition, due to the replacement of a methyl  
242 group by a hydroxymethyl group, HCQ can form two additional hydrogen bonds with D350 and  
243 S44 (in red). We further used SPR to confirm the binding between CQ or HCQ and ACE2. The  
244 binding constant  $K_D$  of these two compounds and ACE2 protein were  $(7.31\pm 0.62)\text{e-}7$  and  
245  $(4.82\pm 0.87)\text{e-}7$  M respectively (Figure 3C).

### 246 *CQ and HCQ suppressed the entrance of 2019-nCoV spike pseudotyped virus into ACE<sup>h</sup>* 247 *cells*

248 ACE<sup>h</sup> cells infected only with 2019-nCoV spike pseudotyped virus were considered as controls, and  
249 the luciferase luminescence value of the control was defined as 1. Under treatment of 0.625  $\mu\text{M}$ ,  
250 1.25  $\mu\text{M}$ , 2.5  $\mu\text{M}$ , 5  $\mu\text{M}$ , 10  $\mu\text{M}$ , and 20  $\mu\text{M}$  CQ, the 2019-nCoV spike pseudotypes virus entrance  
251 ratio were reduced to  $86\pm 0.11$ ,  $69\pm 0.13$ ,  $62\pm 0.19$ ,  $56\pm 0.13$ ,  $44\pm 0.18$  and  $23\pm 0.10\%$ , respectively,  
252 when treated by the same dosage of HCQ, the ratios were  $77\pm 0.07$ ,  $58\pm 0.12$ ,  $53\pm 0.09$ ,  $44\pm 0.08$ ,  
253  $35\pm 0.05$ , and  $29\pm 0.05\%$  respectively (Figure 4). The ability of the 2019-nCoV spike pseudotyped  
254 virus to enter ACE2<sup>h</sup> cells was significantly reduced after treatment with both CQ and HCQ.

## 255 **Discussion**

256 2019-nCoV is globally prevalent in 2020(Wang et al., 2020a), and there are currently no specific  
257 drugs against the virus(Lei et al., 2020). ACE2 is the target receptor of 2019-nCoV (Yan et al., 2020),  
258 and CQ and HCQ have shown certain efficacy in clinical use(Fantini et al., 2020; Ferner and  
259 Aronson, 2020; Meo et al., 2020). This study confirmed that both CQ and HCQ can interact with  
260 ACE2 and inhibit the entry of pseudoviruses.

261 CQ and HCQ have traditionally been used as anti-malaria drugs (White, 2007; White et al., 2014).  
262 They can easily induce a resistance to the malaria parasite (Gasquet et al., 1995), and are still  
263 recommended for use solely against malaria. Further studies are needed to test the sensitivity to  
264 local malaria strains since it is safe, efficient and cheap (Gutman et al., 2017). Recently, they have  
265 also been used commonly as immune modification drugs to treat autoimmune disorders (Plantone  
266 and Koudriavtseva, 2018). The underlying mechanism against malaria seems clear, but the  
267 mechanism of anti-inflammation is still under investigation. An increasing number of people believe  
268 that CQ and HCQ protect lysosomes and could change pH values in lysosome (Mauthe et al.,  
269 2018). The two drugs have been reported to treat certain viral infections, but the antiviral  
270 mechanism remains unclear (Savarino, 2011). In Zika virus infection, CQ has been reported to be  
271 an endocytosis-blocking agent, and can inhibit the virus in different cell models (Delvecchio et al.,  
272 2016). Similarly, 2019-nCoV was driven by endocytosis after binding to ACE2.

273 CQ and HCQ possess structural differences, and the presence of the hydroxymethyl group in HCQ  
274 allows it to form additional hydrogen bonds with ACE2 according to the molecular docking results.  
275 These different modes may finally reveal different bioactivities and affinities of CQ and HCQ on  
276 ACE2. Based on the above results, we further analyzed the binding strength of CQ and HCQ to the  
277 ACE2 protein, and found that both CQ and HCQ display strong binding to the ACE2 protein.

278 Virus entry into cells is a critical step in the process of virus infection (Shang et al., 2020). However,  
279 novel coronavirus research is greatly limited by the need to achieve a laboratory safety level of 3 or  
280 above for direct research using virus strains(Nie et al., 2020). A pseudovirus is a retrovirus that can  
281 integrate the membrane glycoproteins of a different kind of virus to form an external viral membrane,  
282 while retaining the genomic characteristics of the retrovirus itself. Construction of the 2019-nCoV  
283 pseudovirus that can only infect cells once, ensure safety and allows simulation the process of virus  
284 invasion into the cell to detect whether drugs have antiviral activity *in vitro* (Ou et al., 2020).  
285 Therefore, we use 2019-nCoV pseudovirus as an infection model to assess the antiviral effects of CQ  
286 and HCQ. We confirmed that both CQ and HCQ have the ability to suppress the entrance of 2019-nCoV  
287 spike pseudotypes virus into ACE2<sup>h</sup> cells. 2019-nCoV uses ACE2 for cellular entry. Thus, CQ and HCQ  
288 could be good inhibitors to block 2019-nCoV infection of human cells expressing ACE2. However, the  
289 difference in the inhibitory effect of these two drugs on 2019-nCoV needs further study.

290 Our study revealed that CQ and HCQ as ACE2 blockers inhibit the entrance of 2019-nCoV  
291 pseudovirus into the cells, providing new insights into the use of CQ and HCQ for 2019-nCoV  
292 treatment and further control.

## 293 **Author contributions:**

294 Nan Wang: Methodology, Supervision, Visualization, Writing - Original Draft; Shengli Han:  
295 Methodology, Supervision; Rui Liu: Investigation, Validation, Formal analysis; Liesu Meng:



296 Formal analysis, Data Curation; Huaizhen He: Data Curation; Yongjing Zhang: Investigation,  
297 Visualization; Cheng Wang: Visualization, Software; Yanni Lv: Investigation, Validation ; Jue Wang:  
298 Investigation, Visualization; Xiaowei Li: Investigation, Validation; Yuanyuan Ding: Investigation;  
299 Jia Fu: Investigation; Yajing Hou: Investigation; Wen Lu: Investigation; Weina Ma: Methodology;  
300 Yingzhuan Zhan: Data Curation; Bingling Dai: Methodology; Jie Zhang: Methodology; Xiaoyan  
301 Pan: Methodology; Shiling Hu: Investigation; Jiapan Gao: Investigation; Qianqian Jia: Investigation;  
302 Liyang Zhang: Investigation; Shuai Ge: Investigation; Saisai Wang: Investigation; Peida Liang:  
303 Investigation; Tian Hu: Investigation; Jiayu Lu: Investigation; Xiangjun Wang: Investigation;  
304 Huaxin Zhou: Investigation; Wenjing Ta: Investigation; Yuejin Wang: Investigation; Shemin Lu:  
305 Resources, Supervision, Data Curation, Formal analysis, Writing - Review & Editing; Langchong  
306 He: Resources, Supervision, Conceptualization, Funding acquisition

### 307 **Conflicts of Interest**

308 The authors declare no competing financial interest.

### 309 **Acknowledgement**

310 This work was cofounded by National Natural Science Foundation of China (Grant number: 81930096)  
311 and Fundamental Research Funds for the Central Universities of China (Grant number: xzy032020042).

312

## 313 **Figure legend**

314 Figure 1. Effect of CQ and HCQ on the viability of ACE2<sup>h</sup> cells. A. Western blotting analysis of the  
315 expression levels of ACE2 protein in EOL-1 cells, AT2 cells, HSAEpC cells, and ACE2<sup>h</sup> cells. B.  
316 Viability of ACE2<sup>h</sup> cells treated with CQ or HCQ for 24 h. C. The toxicity of HCQ and CQ on  
317 ACE2<sup>h</sup> cells at different time points. D. Calcium (Ca<sup>2+</sup>) flux change in ACE2<sup>h</sup> cells. E. The  
318 apoptosis of ACE2<sup>h</sup> cells treated with CQ or HCQ for 24 h. The experiments were repeat three times.  
319 Data are presented as mean ± S.D. (\**p* < 0.05, \*\**p* < 0.01, \*\*\**p* < 0.001, compared with HEK293T,  
320 or concentration was 0, or HCQ 20 μM, #*p* < 0.05 compared with HCQ 10 μM at corresponding  
321 time points).

322 Figure 2. Effects of CQ and HCQ on the LC3 levels of ACE2<sup>h</sup> cells. ACE<sup>h</sup> cells were treated with  
323 different doses of CQ or HCQ for 24 h. (A) Effects of CQ and HCQ on the fluorescent staining of  
324 FITC-LC3 and TRITC-Phalloidin in ACE<sup>h</sup> cells. (B) The representative blots of autophagy proteins  
325 and changes of LC3-II/LC3-I ratio. The experiments were repeat three times. Data are presented as  
326 mean ± S.D. \**p* < 0.05, \*\**p* < 0.01, \*\*\**p* < 0.001 compared with control.

327 Figure 3. Binding character of CQ and HCQ with ACE2. A. Structural formulas of CQ and HCQ.  
328 B. SPR analysis of CQ or HCQ and ACE2. C. Molecular docking of CQ and HCQ with ACE2.

329 Figure 4. Effect of CQ and HCQ on the entrance of 2019-nCoV spike pseudotyped virus into ACE2<sup>h</sup>  
330 cells. The experiments were repeat three times. Data are presented as mean ± S.D. \**p* < 0.05,  
331 \*\**p* < 0.01, \*\*\**p* < 0.001 compared with group 0.

## 332 **Reference**

- 333 Abdelli, I., Hassani, F., Brikci, S.B., Ghalem, S., 2020. In silico study the inhibition of angiotensin  
334 converting enzyme 2 receptor of COVID-19 by *Ammoides verticillata* components harvested from  
335 Western Algeria. *J Biomol Struct Dyn*.
- 336 Al-Bari, M.A.A., 2017. Targeting endosomal acidification by chloroquine analogs as a promising  
337 strategy for the treatment of emerging viral diseases. *Pharmacol Res Perspe* 5.
- 338 Brufsky, A., 2020. Hyperglycemia, hydroxychloroquine, and the COVID-19 pandemic. *Journal of*  
339 *medical virology* 92, 770-775.
- 340 Delvecchio, R., Higa, L.M., Pezzuto, P., Valadao, A.L., Garcez, P.P., Monteiro, F.L., Loiola, E.C., Dias,  
341 A.A., Silva, F.J., Aliota, M.T., Caine, E.A., Osorio, J.E., Bellio, M., O'Connor, D.H., Rehen, S., de Aguiar,  
342 R.S., Savarino, A., Campanati, L., Tanuri, A., 2016. Chloroquine, an Endocytosis Blocking Agent,  
343 Inhibits Zika Virus Infection in Different Cell Models. *Viruses* 8.
- 344 Fantini, J., Di Scala, C., Chahinian, H., Yahi, N., 2020. Structural and molecular modelling studies  
345 reveal a new mechanism of action of chloroquine and hydroxychloroquine against SARS-CoV-2  
346 infection. *Int J Antimicrob Agents* 55, 105960.
- 347 Ferner, R.E., Aronson, J.K., 2020. Chloroquine and hydroxychloroquine in covid-19. *BMJ* 369,  
348 m1432.
- 349 Gao, J., Tian, Z., Yang, X., 2020. Breakthrough: Chloroquine phosphate has shown apparent efficacy  
350 in treatment of COVID-19 associated pneumonia in clinical studies. *Biosci Trends* 14, 72-73.
- 351 Gasquet, M., Delmont, J., Le Bras, J., Delmas, F., Capdegelle, P., Timon-David, P., 1995.  
352 Chloroquine-resistant falciparum malaria in Mauritania. *Lancet* 346, 1556.
- 353 Gautret, P., Lagier, J.-C., Parola, P., Hoang, V.T., Meddeb, L., Mailhe, M., Doudier, B., Courjon, J.,

354 Giordanengo, V., Vieira, V.E., Dupont, H.T., Honore, S., Colson, P., Chabriere, E., La Scola, B., Rolain,  
355 J.-M., Brouqui, P., Raoult, D., 2020. Hydroxychloroquine and azithromycin as a treatment of  
356 COVID-19: results of an open-label non-randomized clinical trial. *Int J Antimicrob Agents*, 105949.  
357 Geleris, J., Sun, Y., Platt, J., Zucker, J., Baldwin, M., Hripcsak, G., Labella, A., Manson, D.K., Kubin, C.,  
358 Barr, R.G., Sobieszczyk, M.E., Schluger, N.W., 2020. Observational Study of Hydroxychloroquine in  
359 Hospitalized Patients with Covid-19. *The New England journal of medicine* 382, 2411-2418.  
360 Gutman, J., Kovacs, S., Dorsey, G., Stergachis, A., Ter Kuile, F.O., 2017. Safety, tolerability, and  
361 efficacy of repeated doses of dihydroartemisinin-piperaquine for prevention and treatment of  
362 malaria: a systematic review and meta-analysis. *Lancet Infect Dis* 17, 184-193.  
363 Hoffmann, M., Kleine-Weber, H., Schroeder, S., Kruger, N., Herrler, T., Erichsen, S., Schiergens, T.S.,  
364 Herrler, G., Wu, N.H., Nitsche, A., Muller, M.A., Drosten, C., Pohlmann, S., 2020. SARS-CoV-2 Cell  
365 Entry Depends on ACE2 and TMPRSS2 and Is Blocked by a Clinically Proven Protease Inhibitor.  
366 *Cell* 181, 271-+.  
367 Keyaerts, E., Vijgen, L., Maes, P., Neyts, J., Van Ranst, M., 2004. In vitro inhibition of severe acute  
368 respiratory syndrome coronavirus by chloroquine. *Biochemical and biophysical research*  
369 *communications* 323, 264-268.  
370 Klimke, A., Hefner, G., Will, B., Voss, U., 2020. Hydroxychloroquine as an aerosol might markedly  
371 reduce and even prevent severe clinical symptoms after SARS-CoV-2 infection. *Med Hypotheses*  
372 142, 109783.  
373 Lei, C., Qian, K., Li, T., Zhang, S., Fu, W., Ding, M., Hu, S., 2020. Neutralization of SARS-CoV-2 spike  
374 pseudotyped virus by recombinant ACE2-Ig. *Nat Commun* 11, 2070.  
375 Mauthe, M., Orhon, I., Rocchi, C., Zhou, X., Luhr, M., Hijlkema, K.J., Coppes, R.P., Engedal, N., Mari,  
376 M., Reggiori, F., 2018. Chloroquine inhibits autophagic flux by decreasing autophagosome-  
377 lysosome fusion. *Autophagy* 14, 1435-1455.  
378 Meo, S.A., Klonoff, D.C., Akram, J., 2020. Efficacy of chloroquine and hydroxychloroquine in the  
379 treatment of COVID-19. *Eur Rev Med Pharmacol Sci* 24, 4539-4547.  
380 Mercurio, N.J., Yen, C.F., Shim, D.J., Maher, T.R., McCoy, C.M., Zimetbaum, P.J., Gold, H.S., 2020.  
381 Risk of QT Interval Prolongation Associated With Use of Hydroxychloroquine With or Without  
382 Concomitant Azithromycin Among Hospitalized Patients Testing Positive for Coronavirus Disease  
383 2019 (COVID-19). *JAMA Cardiol*.  
384 Mingxing, H., Man, L., Fei, X., Pengfei, P., Jiabi, L., Tiantian, T., Shaoxuan, L., Binghui, C., Jingxian, S.,  
385 Yingying, Y., 2020. Preliminary evidence from a multicenter prospective observational study of the  
386 safety and efficacy of chloroquine for the treatment of COVID-19. *National Science Review*.  
387 Molina, J.M., Delaugerre, C., Le Goff, J., Mela-Lima, B., Ponscarre, D., Goldwirt, L., de Castro, N.,  
388 2020. No evidence of rapid antiviral clearance or clinical benefit with the combination of  
389 hydroxychloroquine and azithromycin in patients with severe COVID-19 infection. *Med Mal Infect*  
390 50, 384.  
391 Nie, J.H., Li, Q.Q., Wu, J.J., Zhao, C.Y., Hao, H., Liu, H., Zhang, L., Nie, L.L., Qin, H.Y., Wang, M., Lu,  
392 Q., Li, X.Y., Sun, Q.Y., Liu, J.K., Fan, C.F., Huang, W.J., Xu, M., Wang, Y.H., 2020. Establishment and  
393 validation of a pseudovirus neutralization assay for SARS-CoV-2. *Emerg Microbes Infect* 9, 680-  
394 686.  
395 Ou, X.Y., Liu, Y., Lei, X.B., Li, P., Mi, D., Ren, L.L., Guo, L., Guo, R.X., Chen, T., Hu, J.X., Xiang, Z.C., Mu,  
396 Z.X., Chen, X., Chen, J.Y., Hu, K.P., Jin, Q., Wang, J.W., Qian, Z.H., 2020. Characterization of spike  
397 glycoprotein of SARS-CoV-2 on virus entry and its immune cross-reactivity with SARS-CoV.

398 Nature Communications 11.  
399 Plantone, D., Koudriavtseva, T., 2018. Current and Future Use of Chloroquine and  
400 Hydroxychloroquine in Infectious, Immune, Neoplastic, and Neurological Diseases: A Mini-Review.  
401 Clin Drug Investig 38, 653-671.  
402 Rainsford, K.D., Parke, A.L., Clifford-Rashotte, M., Kean, W.F., 2015. Therapy and pharmacological  
403 properties of hydroxychloroquine and chloroquine in treatment of systemic lupus erythematosus,  
404 rheumatoid arthritis and related diseases. Inflammopharmacology 23, 231-269.  
405 Savarino, A., 2011. Use of chloroquine in viral diseases. Lancet Infect Dis 11, 653-654.  
406 Savarino, A., Di Trani, L., Donatelli, I., Cauda, R., Cassone, A., 2006. New insights into the antiviral  
407 effects of chloroquine. Lancet Infect Dis 6, 67-69.  
408 Schrezenmeier, E., Dorner, T., 2020. Mechanisms of action of hydroxychloroquine and chloroquine:  
409 implications for rheumatology. Nature reviews. Rheumatology 16, 155-166.  
410 Shang, J., Wan, Y.S., Luo, C.M., Ye, G., Geng, Q.B., Auerbach, A., Li, F., 2020. Cell entry mechanisms  
411 of SARS-CoV-2. P Natl Acad Sci USA 117, 11727-11734.  
412 Vincent, M.J., Bergeron, E., Benjannet, S., Erickson, B.R., Rollin, P.E., Ksiazek, T.G., Seidah, N.G.,  
413 Nichol, S.T., 2005. Chloroquine is a potent inhibitor of SARS coronavirus infection and spread. Virology  
414 J 2, 69.  
415 Wang, C., Horby, P.W., Hayden, F.G., Gao, G.F., 2020a. A novel coronavirus outbreak of global  
416 health concern. Lancet 395, 470-473.  
417 Wang, M., Cao, R., Zhang, L., Yang, X., Liu, J., Xu, M., Shi, Z., Hu, Z., Zhong, W., Xiao, G., 2020b.  
418 Remdesivir and chloroquine effectively inhibit the recently emerged novel coronavirus (2019-  
419 nCoV) in vitro. Cell Res 30, 269-271.  
420 White, N.J., 1996. The treatment of malaria. The New England journal of medicine 335, 800-806.  
421 White, N.J., 2007. Cardiotoxicity of antimalarial drugs. Lancet Infect Dis 7, 549-558.  
422 White, N.J., Pukrittayakamee, S., Hien, T.T., Faiz, M.A., Mokuolu, O.A., Dondorp, A.M., 2014. Malaria.  
423 Lancet 383, 723-735.  
424 Wrapp, D., Wang, N.S., Corbett, K.S., Goldsmith, J.A., Hsieh, C.L., Abiona, O., Graham, B.S., McLellan,  
425 J.S., 2020. Cryo-EM structure of the 2019-nCoV spike in the prefusion conformation. Science 367,  
426 1260-+.  
427 Wu, Y., Wang, F., Shen, C., Peng, W., Li, D., Zhao, C., Li, Z., Li, S., Bi, Y., Yang, Y., Gong, Y., Xiao, H.,  
428 Fan, Z., Tan, S., Wu, G., Tan, W., Lu, X., Fan, C., Wang, Q., Liu, Y., Zhang, C., Qi, J., Gao, G.F., Gao, F.,  
429 Liu, L., 2020. A noncompeting pair of human neutralizing antibodies block COVID-19 virus binding  
430 to its receptor ACE2. Science 368, 1274-1278.  
431 Xiao, L., Sakagami, H., Miwa, N., 2020. ACE2: The key Molecule for Understanding the  
432 Pathophysiology of Severe and Critical Conditions of COVID-19: Demon or Angel? Viruses 12.  
433 Yan, R., Zhang, Y., Li, Y., Xia, L., Guo, Y., Zhou, Q., 2020. Structural basis for the recognition of  
434 SARS-CoV-2 by full-length human ACE2. Science 367, 1444-1448.  
435 Zheng, Y.Y., Ma, Y.T., Zhang, J.Y., Xie, X., 2020. COVID-19 and the cardiovascular system. Nat Rev  
436 Cardiol 17, 259-260.  
437 Zou, X., Chen, K., Zou, J., Han, P., Hao, J., Han, Z., 2020. Single-cell RNA-seq data analysis on the  
438 receptor ACE2 expression reveals the potential risk of different human organs vulnerable to 2019-  
439 nCoV infection. Front Med 14, 185-192.

440

441 Figure 1.

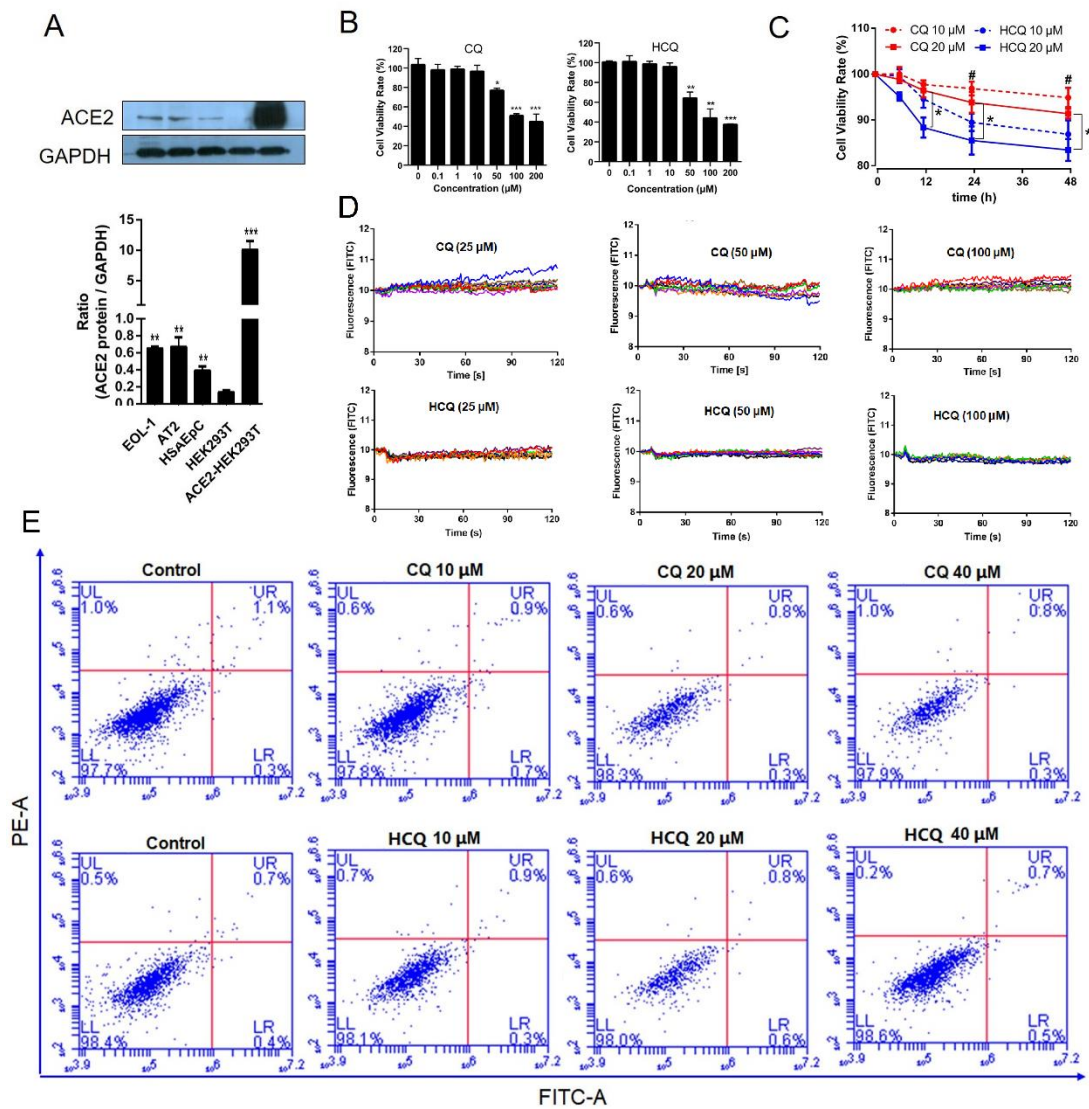

442

443

444

445

446

447

448

449

450

451

452

453 Figure 2.

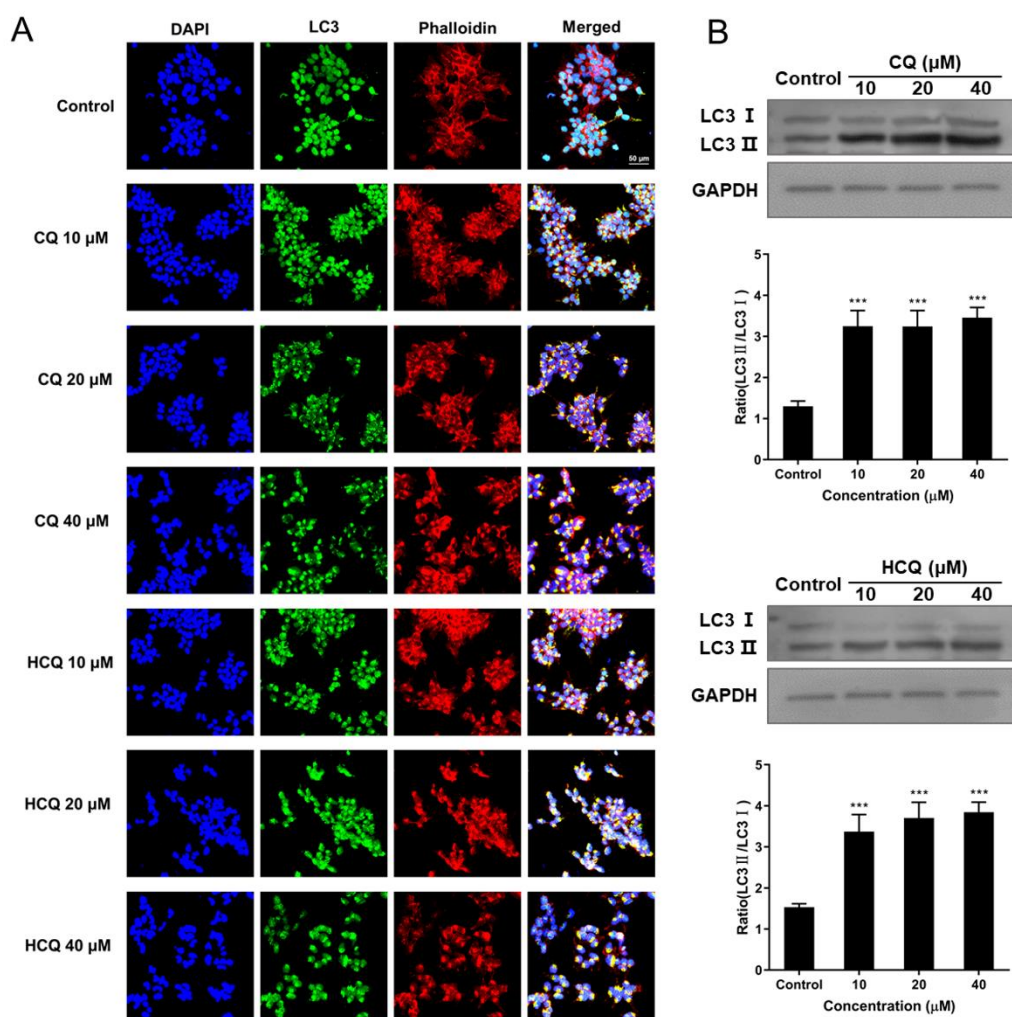

454

455

456

457

458

459

460

461

462

463

464

465

466

467 Figure 3.

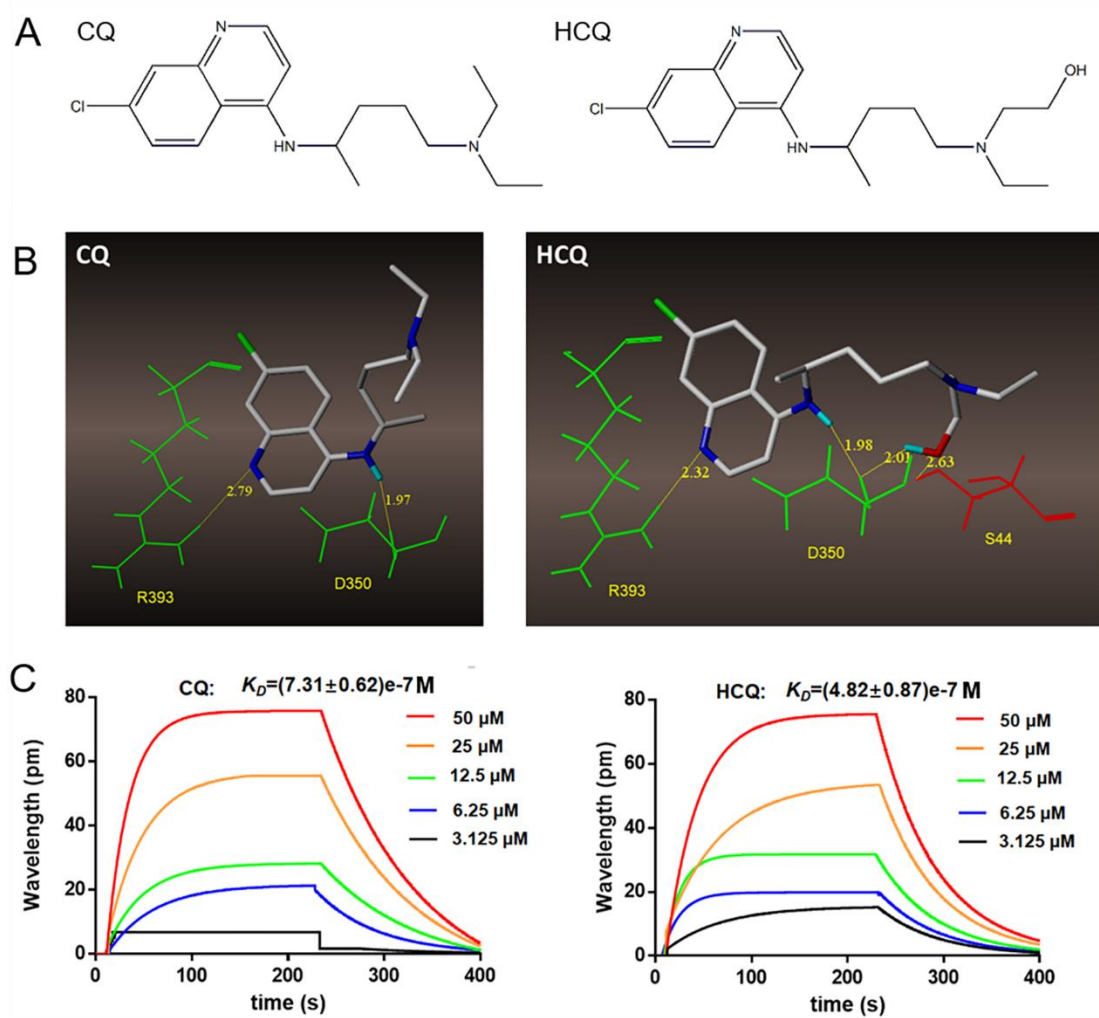

468

469

470

471

472

473

474

475

476

477

478

479

480

481 Figure 4.

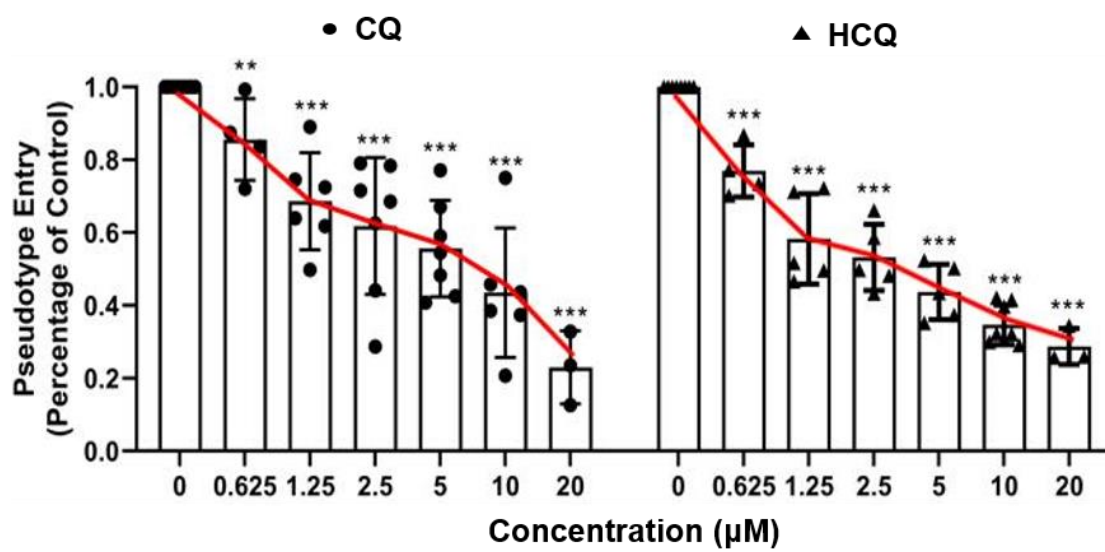

482
